# Supplementary figures and images for: H3K36 Di-Methylation Marks, Mediated by Ash1 in Complex with Caf1-55 and MRG15, Are Required during Drosophila Heart Development
Source: MDPI journal article supplement (doi:10.3390/jcdd10070307), 2023-07-18

Supplemental Figure 1

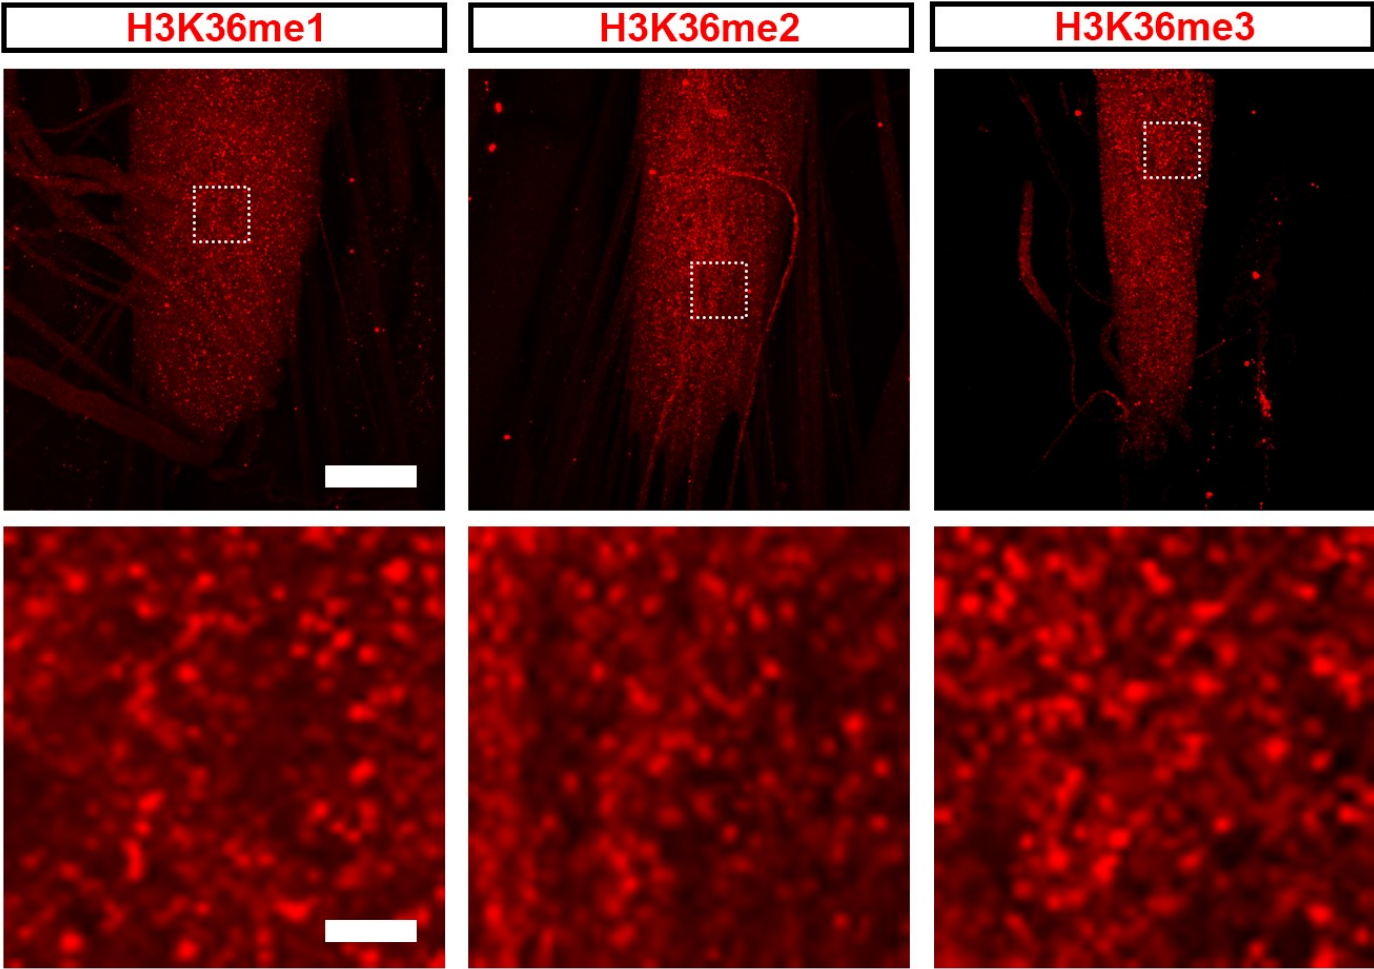

Supplement: s1 [file s1]
